# Supplementary material
Source: PubMed Central journal article supplement (PMC6567590)
Supplement: 843827_Supplemental_Material1.pdf [file 843827_Supplemental_Material1.pdf]

## **Supporting materials**

### **Methods**

#### **Fibroblast cultures**

MRC-5 were cultured in Dulbecco's modified Eagle Medium (DMEM) containing 10% fetal bovine serum (FBS, GIBCO, Grand Island, NY, USA), 100 U/ml of penicillin and 100 mg/ml of streptomycin (GIBCO) in a humidified incubator at 5% CO<sub>2</sub>. Passages between 4 and 8 were used for this study. Fibroblasts were seeded in 6-well plates and grown to sub-confluence. Thereafter, cells were washed in sterile PBS for 3 times and serum-starved for 24 hours before challenge with the recombinant human IL-25, human transforming growth factor (TGF)- $\beta$ 1 or both (10 ng/ml of IL-25 and TGF- $\beta$ 1) as indicated in the main text.

#### **Histologic analysis**

To be briefly, samples were fixed in 4% formaldehyde, and were dehydrated by using a serial alcohol gradient in an automated Leica Tissue Processor. Thereafter, samples were embedded in paraffin wax blocks and sliced into 3  $\mu$ m-thick lung tissue sections for Hematoxylin-Eosin (HE) and Masson-Trichrome staining as per the instructions of the Kits (Solarbio Science & Technology Co., Ltd. Beijing, China).

#### **Immunohistochemistry of lung tissues**

Immunohistochemistry (IHC) of lung tissues was performed on paraffin-embedded lung tissue sections. Briefly, immunostaining was performed by using the

avidin–biotinylated HRP enzyme complex method (ThermoFisher Scientific, Waltham, MA, USA) with antibodies against human IL-25, IL-17BR, and mouse Collagen I, Collagen III, Fibronectin, CTGF, FGFR4 (for fibroblast detecting) (all from Abcam, Cambridge, MA, USA), or polyclonal non-immune IgG controls. After incubation for overnight at 4°C, the slides were incubated with a biotin-conjugated secondary antibody for 30 minutes at room temperature, and subsequently with Vector ABC complex as per manufacturer's protocol. Color development was performed by using 3,3-diaminobenzidine (DAB, Solarbio) as a chromogen for 3-5 minutes. Slides were counterstained with haematoxylin for nucleus staining. The slides were observed by independent professors on a Leica microscope (Leica, Wetzlar, Germany).

### **BALF collection and harvest of lung homogenate**

BALF was collected by using a tracheal cannula with 1.0 ml of cold sterile saline. The fluid recovery rate was approximately 80-90% in this study. Then the sample was centrifuged at 1000 g for 5 min at 4 °C. The cell-free supernatant was stored at –80 °C for the measurements of IL-5 and IL-13. Next, partial tissues from right lung were homogenized in 1 ml of PBS containing 1% Triton X-100 and a protease inhibitor cocktail tablet (Roche, Mannheim, Germany) by using hand-held homogenizer. Debris was removed by centrifugation at 12000 g for 15 minutes, and the supernatant were harvested for the detection of total collagen, and the expression levels of IL-5 and IL-13.

### **Protein extraction and Western blot**

Lung tissues were washed in ice-cold phosphate buffered saline (PBS), and treated with RIPA lysis buffer (ThermoFisher) containing complete protease and phosphatase inhibitor cocktail (Roche) for 15 minutes at 4°C. Thereafter, cell debris was discarded by centrifugation at 12,000g for 15 minutes, and protein concentration was detected by using the BCA assay (ThermoFisher) before degeneration in loading buffer at 96°C for 5 minutes. 10 µg of total proteins was isolated by 10% SDS-PAGE and electrotransferred to nitrocellulose (NC) membranes (Millipore, Billerica, MA, USA). Membranes were blocked with 5% nonfat dry milk in TBST (10 mmol/L Tris-HCl, pH 7.6; 150 mmol/L NaCl; 0.1% Tween-20) for at least 1 hours at room temperature, and incubated with the following primary antibodies overnight at 4°C: mouse monoclonal anti-IL-17BR, mouse monoclonal anti-IL-17RA, and mouse monoclonal anti-IL-25(all from Abcam, Cambridge, MA, USA). After 3 extensive washing for 30 minutes, membranes were treated with horseradish peroxidase–conjugated anti-mouse secondary antibody and assessed by an enhanced chemiluminescence detection buffer (KPL) with ChemiDoc XRS (Bio-Rad, Hercules, CA, USA). The band intensity was quantified using Image J image processing program (NIH Image, Bethesda, MD, USA).

### **RNA purification and real time RT PCR**

Total cellular RNA from fibroblasts or lung tissues was isolated by using RNeasy

mini kit extraction columns (Tiangen, Beijing, China) and 2  $\mu\text{g}$  of RNA was reverse-transcribed at 37°C for 1 hours with the Omniscript RT kit (Tiangen) by using oligo dT primers (1 mmol/L). Real-time quantification of mRNA levels was performed by ABI PRISM 7500 instrument (Applied Biosystems, Foster City, CA, USA) using SYBRGreen PCR reagents (Tiangen). Reaction mixtures were incubated for 2 min at 94°C, followed by another 40 cycles (94°C for 15 second, 55°C for 20 second, and 68°C for 35 second).  $\beta$ -actin was performed as a housekeeping gene to correct for variations in cDNA content between different samples. The relative expression level of target genes was calculated by using the  $2^{-\Delta\text{Ct}}$  or  $2^{-\Delta\Delta\text{Ct}}$  method. The mRNA expression levels derived from fibroblasts were expressed as the fold changes in comparison to vehicle-treated controls. Primer sequences were shown in Table S1.

### **Cell proliferation assay**

For CCK-8 assay, cells were placed in 96-well plates at an initial density of  $5 \times 10^3$ /well and incubated for 24 hours before serum-starved for 24 hours. Thereafter, cells were challenged with hIL-25 and TGF- $\beta$ 1 as indicated before. After culture for another 24, 48 and 72 hours, the supernatant was discarded, and 10  $\mu\text{l}$  of CCK-8 solution was added to each well. The absorbance was detected at 450 nm via enzyme-linked immunometric meter (ThermoFisher). Furthermore, DNA synthesis was determined by using an EdU incorporation assay. Briefly, cells were cultured in 24-well plates and treated with hIL-25 and TGF- $\beta$ 1 for 72 hours after sufficient serum

starvation. Thereafter, the cells were incubated with EdU solution for 3 hours, and were fixed and incubated with 1× Apollo buffer for 30 minutes at room temperature. The DNA contents were stained with 1× DAPI buffer. Finally, the numbers of positive cells were observed and recorded with a fluorescent microscope (Olympus, Tokyo, Japan).

### **Figure legends**

#### **Fig.S1 Lung expression levels of IL-25, IL-17RA, IL-17BR determined by Real time PCR and WB**

The mRNA levels of IL-25 (A), IL-17RA (B) and IL-17BR (C) in normal and IPF lung tissues, as quantified by real-time RT-PCR are shown by  $2^{-\Delta\text{ct}}$  method. Also, Example immuno-blots and densitometric ratios of IL-25/IL-17RA/IL-17BR to  $\beta$ -actin are depicted as bar graphs (D). Data are shown as Means $\pm$ SEMs of 3 independent experiments.  $N=9$  of IPF patients and  $N=6$  of normal healthy controls. Student  $t$  test was used for the comparison. \* $P<.05$ , \*\* $P<.01$ , \*\*\* $P<.001$  compared with normal controls.

#### **Fig.S2 IgG-isotype control for human IHC assay**

Representative photomicrograph of lung tissue slide from IPF patients incubated with mouse IgG isotype control. We showed that no positive staining in lung tissue sections. Original magnification: bar = 100  $\mu\text{m}$ .

**Fig.S3 Lung histological features induced by mIL-25 intra-nasal instillation**

Mice were intranasal injected with mIL-25 or saline and were sacrificed at day 3, 7, 19, 31 for lung tissue process. Representative HE staining with low-power histology images ( $N=5$  per group) depicting infiltration of inflammatory cells (termed as lymphoid follicles or aggregates) and collagen deposition within the lung are shown. Squares in F and H indicate infiltrated lymphoid follicles.

**Fig.S4 IgG-isotype control for mice IHC assay**

Representative photomicrograph of lung tissue slide from IL-25 or saline treated mice incubated with IgG isotype control. We showed that no positive staining in lung tissue sections. Original magnification: bar = 100  $\mu\text{m}$ .
