# Supplementary material
Source: PubMed Central journal article supplement (PMC6567590)
Supplement: 843827_Supplemental_Material2.pdf [file 843827_Supplemental_Material2.pdf]

**Table S1 Primers used for Real-Time RT PCR reactions**

| Genes<br>(human) | Forward primer                 | Reverse primer                 |
|------------------|--------------------------------|--------------------------------|
| $\beta$ -actin   | 5'-TGCTATCCAGGCTGTGCTAT-3'     | 5'-AGTCCATCACGATGCCAGT-3'      |
| IL-25            | 5'-CGACCCAGATTAGGTGAGGA-3'     | 5'-TCCATCTTCACTGGCCCTAC-3'     |
| IL-17RA          | 5'- GGAGGAGCAGCGGCAGTCA-3'     | 5'-TGTCCCAGCCCGAGTTCTTC-3'     |
| IL-17BR          | 5'-AACAGGCGTCCCTTTCCCTCTGGA-3' | 5'-TTCTTGATCCTTTCGTGCCTCCAC-3' |
| CTGF             | 5'-CCTGCAGGCTAGAGAAGCAGA-3'    | 5'-TTTGGGAGTACGGATGCACTT-3'    |
| Collagen I       | 5'- TGGCCTCGGAGGAACTTT-3'      | 5'- TCCGGTTGATTTCTCATCATAGC-3' |
| Collagen III     | 5'-TGGTCCCCAAGGTGTCAAAG-3'     | 5'-GGGGGTCCTGGGTTACCATTA-3'    |
| $\alpha$ -SMA    | 5'-GACCGAATGCAGAAGGAGAT-3'     | 5'-CCACCGATCCAGACAGAGTA-3'     |
| Fibronectin      | 5'-GTGCCTGGGCAACGGA-3'         | 5'-CCCGACCCTGACCGAAG-3'        |
| MMP-1            | 5'-CCCCAAAAGCGTGTGACAGTA-3'    | 5'-GGTAGAAGGGATTTGTGCG-3'      |
| MMP-9            | 5'-GCAAGGGCGTCGTGGTTCC-3'      | 5'-GGTCGTCGGTGTTCGTAGTTGG-3'   |
| TIMP-1           | 5'-GCTGACATCCGGTTCGTCTAC-3'    | 5'-GTTGTGGGACCTGTGGAAGTA-3'    |

---
