# Supplementary material
Source: PubMed Central journal article supplement (PMC6567590)
Supplement: 843827_Supplemental_Material6.pdf [file 843827_Supplemental_Material6.pdf]

Control

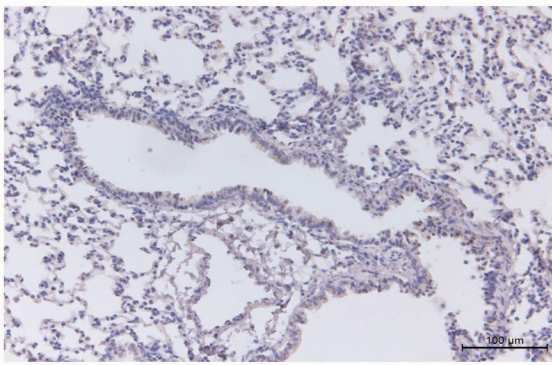

IL-25

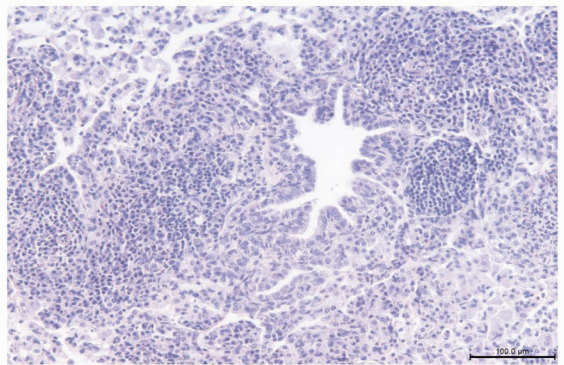

isotope IgG for collagen I staining

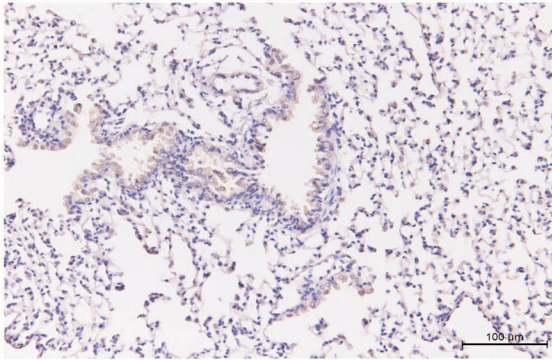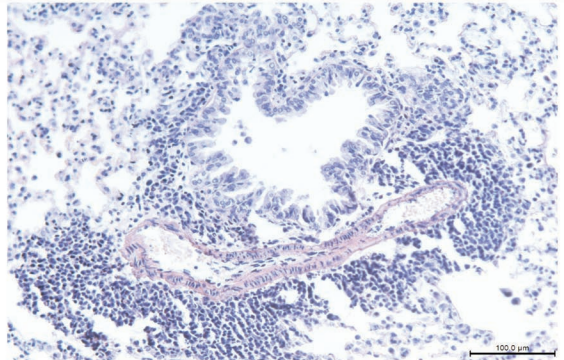

isotope IgG for collagen III staining

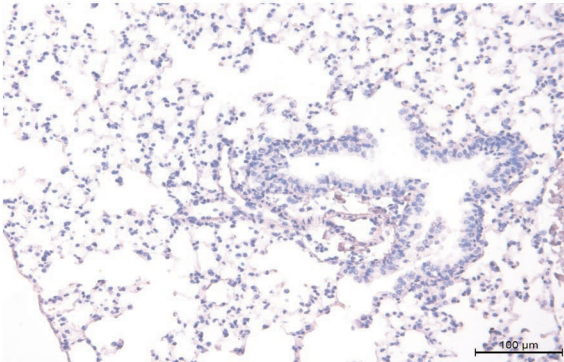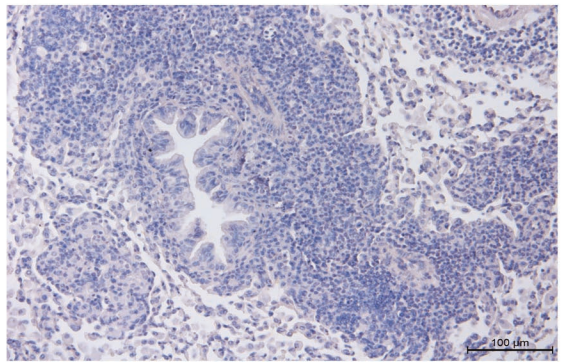

isotope IgG for fibronectin staining

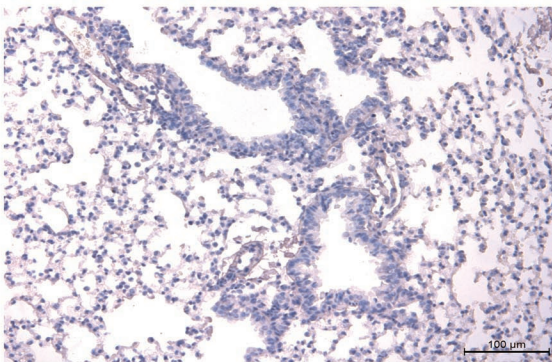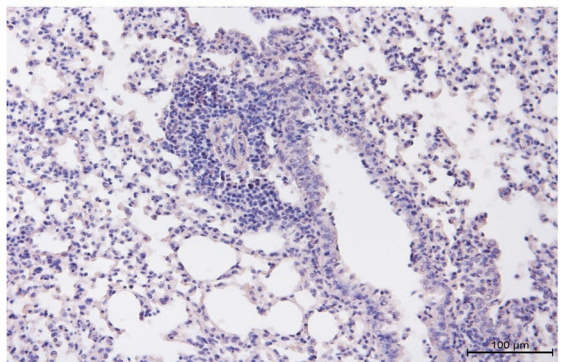

isotope IgG for CTGF staining

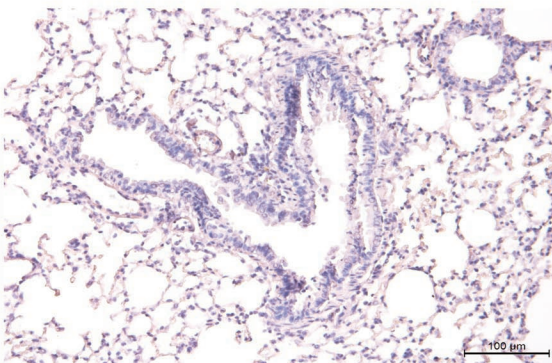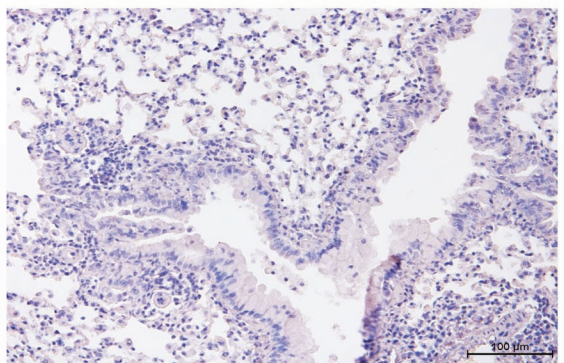

isotope IgG for FGFR4 staining
