# Supplementary material
Source: PubMed Central journal article supplement (PMC6567590)

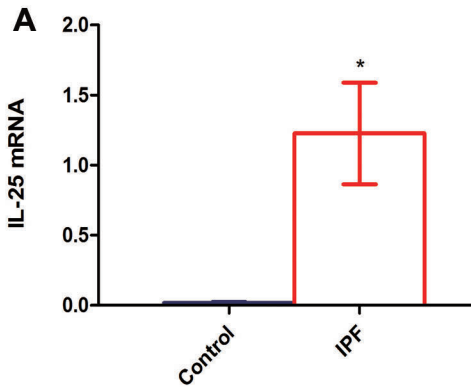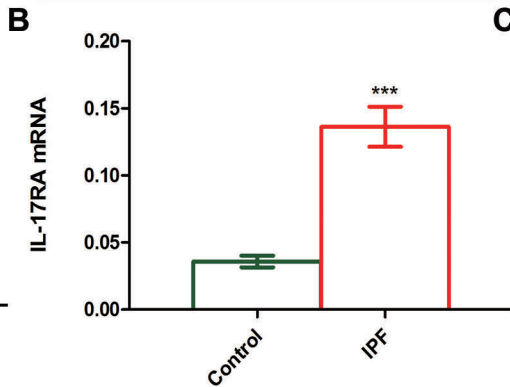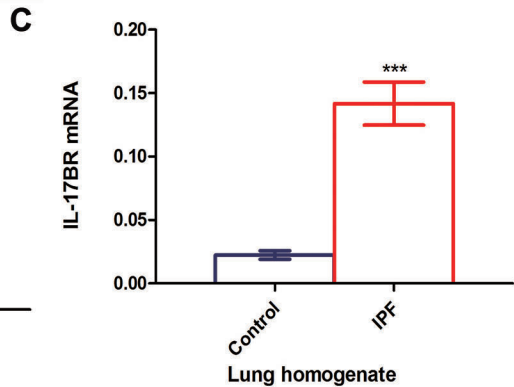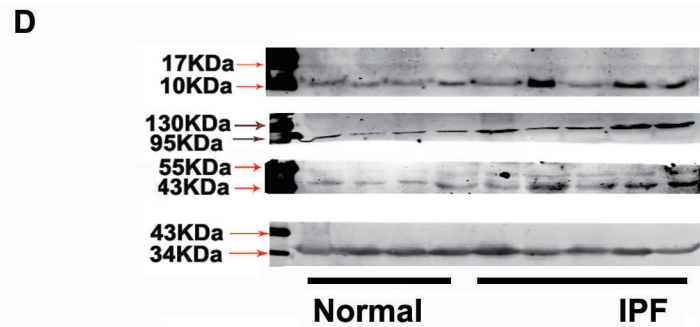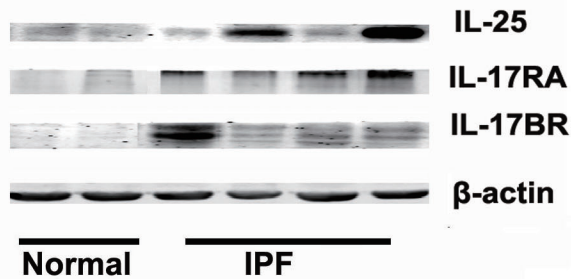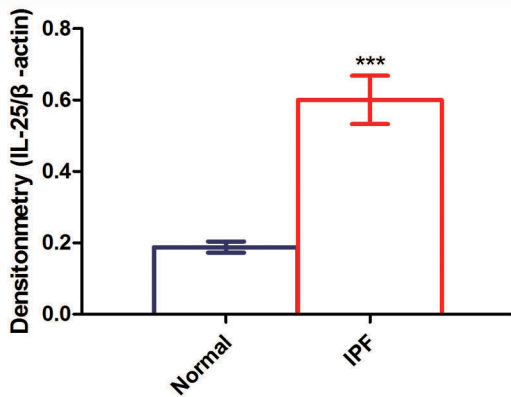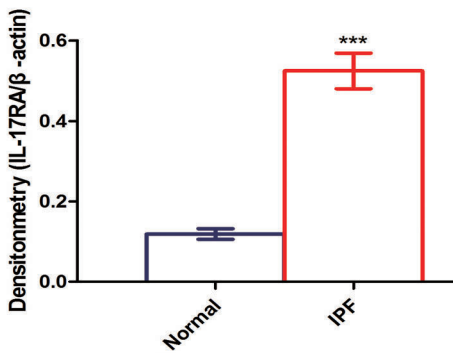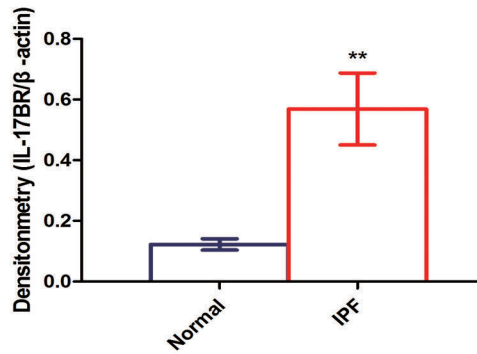

Supplement: 843827_Supplemental_Material3.pdf [file 843827_Supplemental_Material3.pdf]

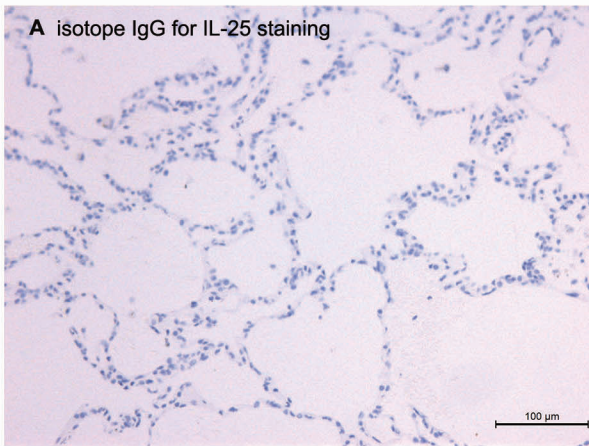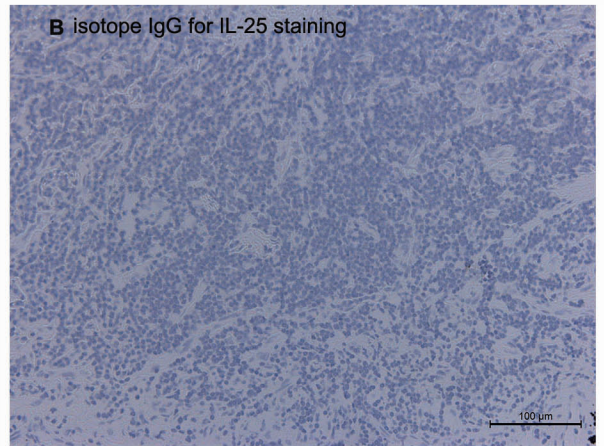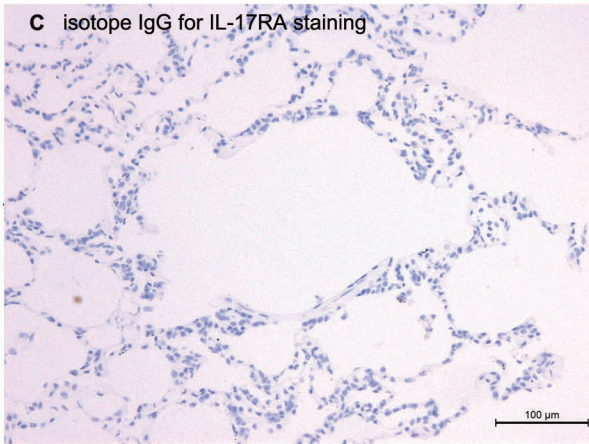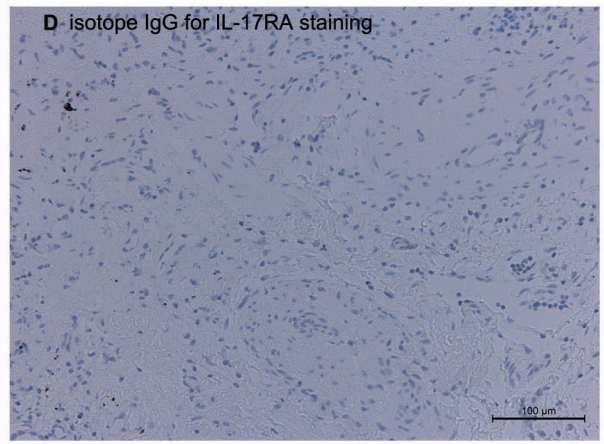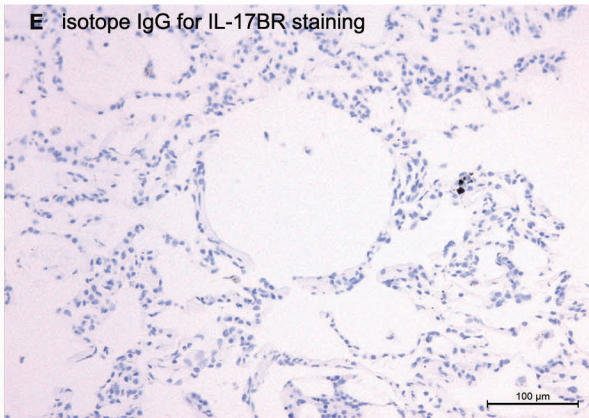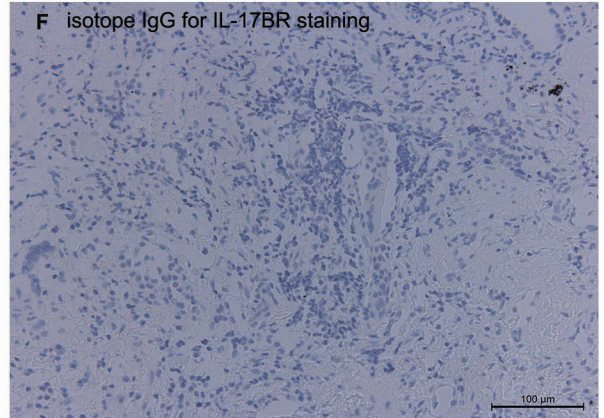

**Normal controls**

**IPF patients**

Supplement: 843827_Supplemental_Material4.pdf [file 843827_Supplemental_Material4.pdf]

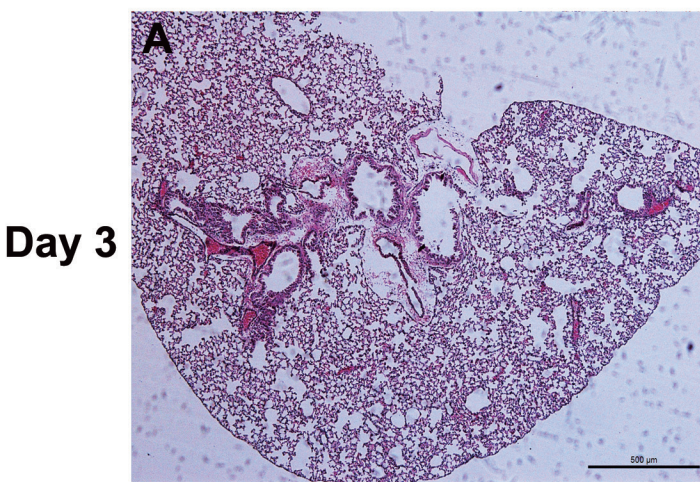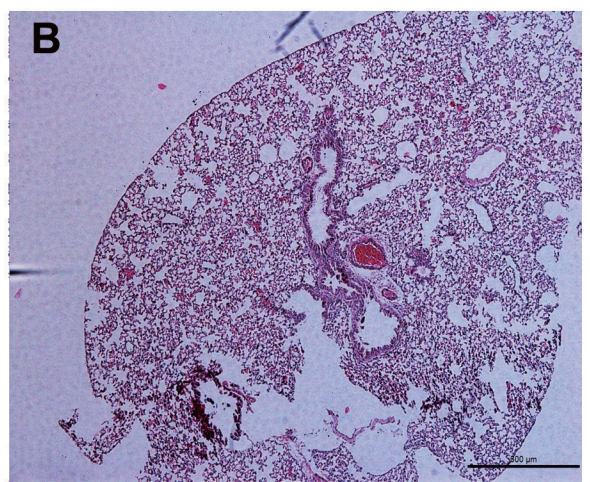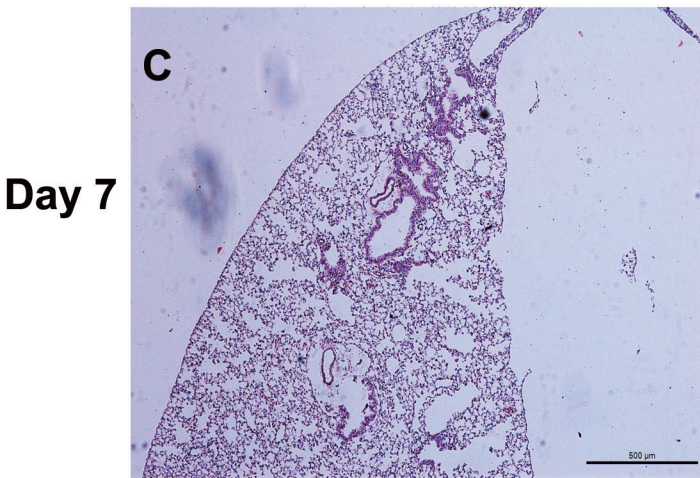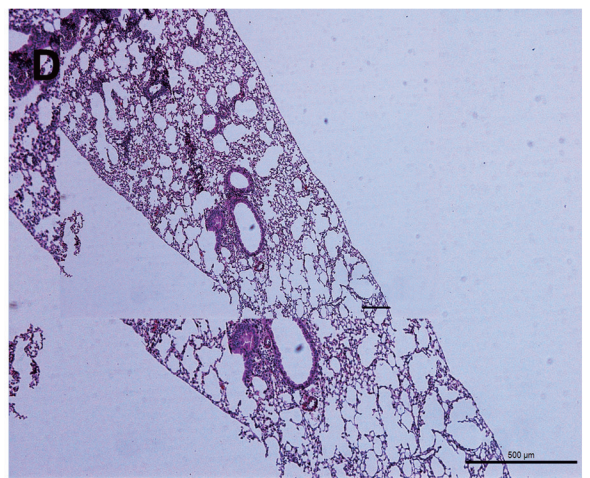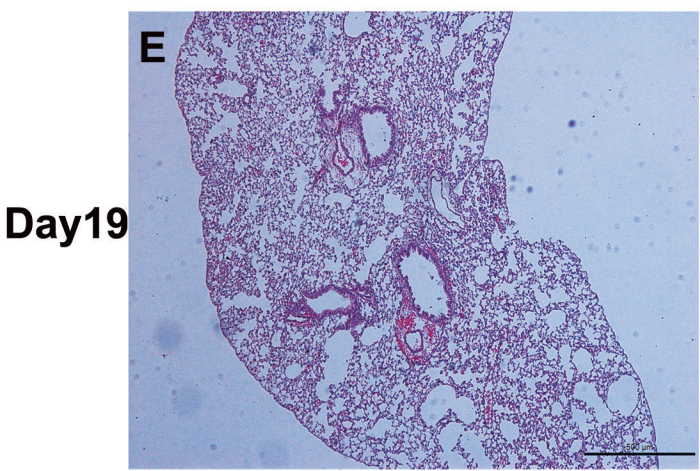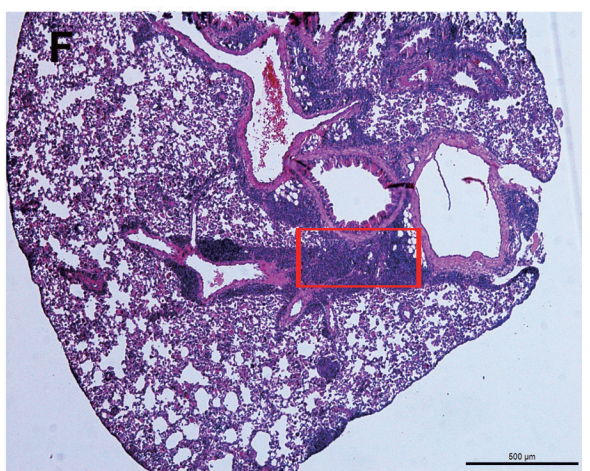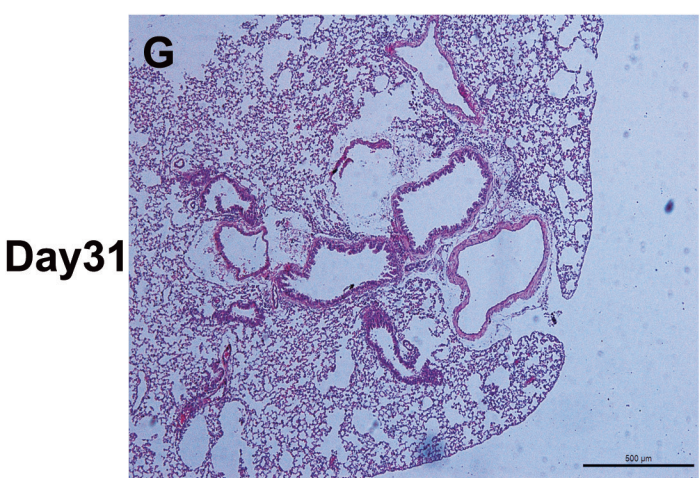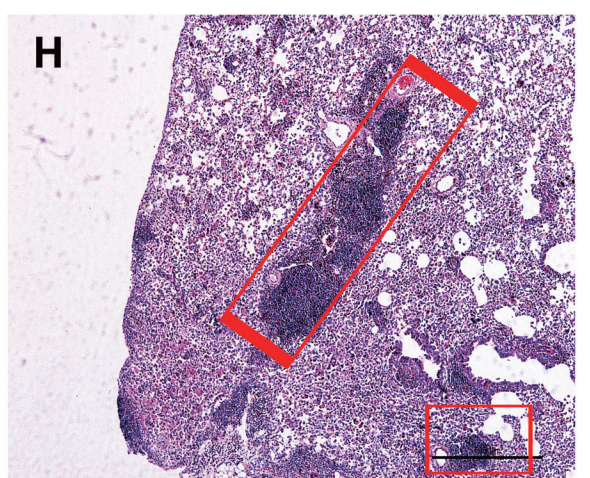

**Saline**

**IL-25**

Supplement: 843827_Supplemental_Material5.pdf [file 843827_Supplemental_Material5.pdf]
